# Supplementary material
Source: HighWire-hosted journal article supplement (https://bmjopen.bmj.com/content/14/11/e078660)
Supplement: inline-supplementary-material-4 [file inline-supplementary-material-4.pdf]

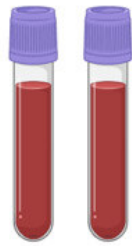

**4 mL each of venous  
blood in 2 red-top tubes  
from each patient**

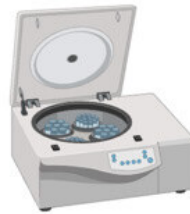

**Centrifugation  
process**

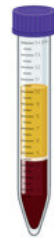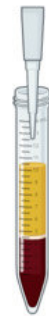

**2.0 mL of serum**

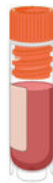

**700 µL x 1 cryovial  
buffy coat**

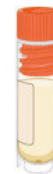

**1.25 mL x 1 cryovial  
plasma**
